# Supplementary material
Source: ML conference proceedings conference paper supplement (https://proceedings.neurips.cc/paper_files/paper/2013/hash/021bbc7ee20b71134d53e20206bd6feb-Abstract.html)
Supplement: Supplementary file [file 021bbc7ee20b71134d53e20206bd6feb-Supplemental.zip]

---

# Approximate Gaussian process inference for the drift of stochastic differential equations

## Supplementary material

---

**Andreas Ruttor**  
Computer Science, TU Berlin  
andreas.ruttor@tu-berlin.de

**Philipp Batz**  
Computer Science, TU Berlin  
philipp.batz@tu-berlin.de

**Manfred Opper**  
Computer Science, TU Berlin  
manfred.opper@tu-berlin.de

### A Posterior drift

$$g_t(x) = \lim_{\Delta t \rightarrow 0} \frac{1}{\Delta t} E[X_{t+\Delta t} - X_t | X_t = x, X_\tau = y] \quad (1)$$

$$= \lim_{\Delta t \rightarrow 0} \frac{1}{\Delta t} \frac{\int (x' - x) p_{\tau-t-\Delta t}(y|x') p_{\Delta t}(x'|x) dx'}{\int p_{\tau-t-\Delta t}(y|x') p_{\Delta t}(x'|x) dx'} \quad (2)$$

$$= \lim_{\Delta t \rightarrow 0} \frac{1}{\Delta t} \frac{f(x)\Delta t + E_u[p_{\tau-t-\Delta t}(y|x + f(x)\Delta t + u)u]}{E_u[p_{\tau-t-\Delta t}(y|x + f(x)\Delta t + u)]} \quad (3)$$

$$= f(x) + D \lim_{\Delta t \rightarrow 0} \frac{\nabla_x E_u[p_{\tau-t-\Delta t}(y|x + f(x)\Delta t + u)]}{E_u[p_{\tau-t-\Delta t}(y|x + f(x)\Delta t + u)]} \quad (4)$$

$$= f(x) + D \lim_{\Delta t \rightarrow 0} \nabla_x \ln \{E_u[p_{\tau-t-\Delta t}(y|x + f(x)\Delta t + u)]\} \quad (5)$$

$$= f(x) + D \nabla_x \ln \{p_{\tau-t}(y|x)\}. \quad (6)$$

The second line follows from the definition of the conditional density, the 3rd line from the fact that  $p_{\Delta t}(x'|x) = \mathcal{N}(x + f(x)\Delta t; D\Delta t)$  and  $u \sim \mathcal{N}(0; \sigma^2\Delta t)$ . The fourth line is based on the fact that for zero mean Gaussian random vectors with covariance  $S$ , we have  $E[ug(u)] = SE_u[\nabla_u g(u)]$ . Finally, the last line is obtained by noting that as  $\Delta t \rightarrow 0$ , the covariance of  $u$  vanishes.

### B Kullback–Leibler optimal sparsity

#### B.1 The general case

We assume a collection of random variables  $\mathbf{f} = \{f(x)\}_{x \in T}$  where the index variable  $x \in T$  takes values in some index set  $T$ . We will assume a *prior measure* denoted by  $P_0(\mathbf{f})$  and a *posterior measure* of the form

$$P(\mathbf{f}) = \frac{1}{Z} P_0(\mathbf{f}) e^{-U(\mathbf{f})} \quad (7)$$

where  $U(\mathbf{f})$  is a functional of  $\mathbf{f}$ . The goal is to approximate  $P$  by another measure  $Q$  of the form

$$Q(\mathbf{f}) = P_0(\mathbf{f}) R(\mathbf{f}_s) \quad (8)$$

where the effective likelihood  $R$  depends only on a smaller, the *sparse* set  $\mathbf{f}_s = \{f(x)\}_{x \in S}$  of dimension  $m$ .  $S$  is not necessarily a subset of  $T$ .  $R$  will be chosen to minimize the Kullback–Leibler divergence

$$KL(Q||P) = E_Q[\log(Q/P)]. \quad (9)$$

We write the joint measure of  $\mathbf{f}$  and  $\mathbf{f}^S$  as

$$Q(\mathbf{f}, \mathbf{f}_s) = Q(\mathbf{f}|\mathbf{f}_s)Q(\mathbf{f}_s) = P_0(\mathbf{f}|\mathbf{f}_s)Q(\mathbf{f}_s), \quad (10)$$

where the last equality follows from the fact that fixing the sparse set  $\mathbf{f}_s$ ,  $R(\mathbf{f}_s)$  becomes nonrandom and the dependency on the random variables  $\mathbf{f}$  is only via  $P_0$ . Hence, the KL divergence is obtained

$$KL(Q||P) = \ln Z + \int d\mathbf{f}_s Q(\mathbf{f}_s) \log \left( \frac{e^{\ln R(\mathbf{f}_s)}}{e^{-E_0[U(\mathbf{f}|\mathbf{f}_s)]}} \right) \quad (11)$$

by integrating out all variables except  $\mathbf{f}_s$ .  $E_0[U(\mathbf{f}|\mathbf{f}_s)]$  is the conditional expectation w.r.t. the prior  $P_0$ . Hence, the optimal choice for  $R$  is

$$R(\mathbf{f}_s) \propto e^{-E_0[U(\mathbf{f}|\mathbf{f}_s)]}. \quad (12)$$

## B.2 Gaussian random variables

If  $P_0$  is Gaussian measure and

$$U(\mathbf{f}) = \frac{1}{2} \mathbf{f}^\top \mathbf{\Lambda} \mathbf{f} - \mathbf{a}^\top \mathbf{f} \quad (13)$$

is a quadratic form, the posterior is also Gaussian. We can then further simplify the conditional expectation (12) to

$$E_0[U(\mathbf{f})|\mathbf{f}_s] = \frac{1}{2} (E_0\{\mathbf{f}|\mathbf{f}_s\})^\top \mathbf{\Lambda} E_0\{\mathbf{f}|\mathbf{f}_s\} - \mathbf{a}^\top E_0\{\mathbf{f}|\mathbf{f}_s\} + C \quad (14)$$

where  $C = \frac{1}{2} \text{tr}(\text{Cov}_0\{\mathbf{f}|\mathbf{f}_s\} \mathbf{\Lambda})$  is a constant independent of  $\mathbf{f}_s$ . This follows from the fact that for a Gaussian measures, all joint and conditional distributions are Gaussian,  $E_0\{\mathbf{f}|\mathbf{f}_s\}$  is the optimal mean square predictors of the Gaussian vector  $\mathbf{f}$  given  $\mathbf{f}_s$  [1]: and the difference  $\mathbf{f} - E_0\{\mathbf{f}|\mathbf{f}_s\}$  is a random vector which is *independent* of the vector  $\mathbf{f}_s$ . Hence the conditional covariance  $\text{Cov}_0$  of  $\mathbf{f}$  does not depend on  $\mathbf{f}_s$ . The explicit result for this predictor is given by

$$E_0[\mathbf{f}|\mathbf{f}_s] = \boldsymbol{\pi} \mathbf{f}_s, \quad (15)$$

where  $\boldsymbol{\pi} = \mathbf{K}_{Ns} \mathbf{K}_s^{-1}$ ,  $\mathbf{K}_s$  is the kernel matrix for the sparse set, and  $\mathbf{K}_{Ns}$  is the  $N \times m$  kernel matrix between the non-sparse and the sparse set.

For the infinite dimensional case of the form

$$U(\mathbf{f}) = \frac{1}{2} \int f^2(x) \Lambda(x) dx - \int f(x) y(x) dx \quad (16)$$

we use the fact that

$$E_0[f(x)|\mathbf{f}_s] = \mathbf{k}_s^\top(x) (\mathbf{K}_s)^{-1} \mathbf{f}_s, \quad (17)$$

so that

$$E_0[U(\mathbf{f})|\mathbf{f}_s] = \frac{1}{2} \mathbf{f}_s^\top \mathbf{K}_s^{-1} \left\{ \int \mathbf{k}_s(x) \Lambda(x) \mathbf{k}_s^\top(x) dx \right\} \mathbf{K}_s^{-1} \mathbf{f}_s - \mathbf{f}_s^\top \mathbf{K}_s^{-1} \int \mathbf{k}_s(x) a(x) dx. \quad (18)$$

## References

- [1] Athanasios Papoulis. *Probability, random variables, and stochastic processes*. 1965.
